# Supplementary material for: Moringa oleiferaleaf polysaccharides exert anti-lung cancer effects upon targeting TLR4 to reverse the tumor-associated macrophage phenotype and promote T-cell infiltration
Source: Royal Society of Chemistry journal article supplement (doi:10.1039/d2fo03685a), 2023-01-01
Supplement: d2fo03685a1.pdf [file d2fo03685a1.pdf]

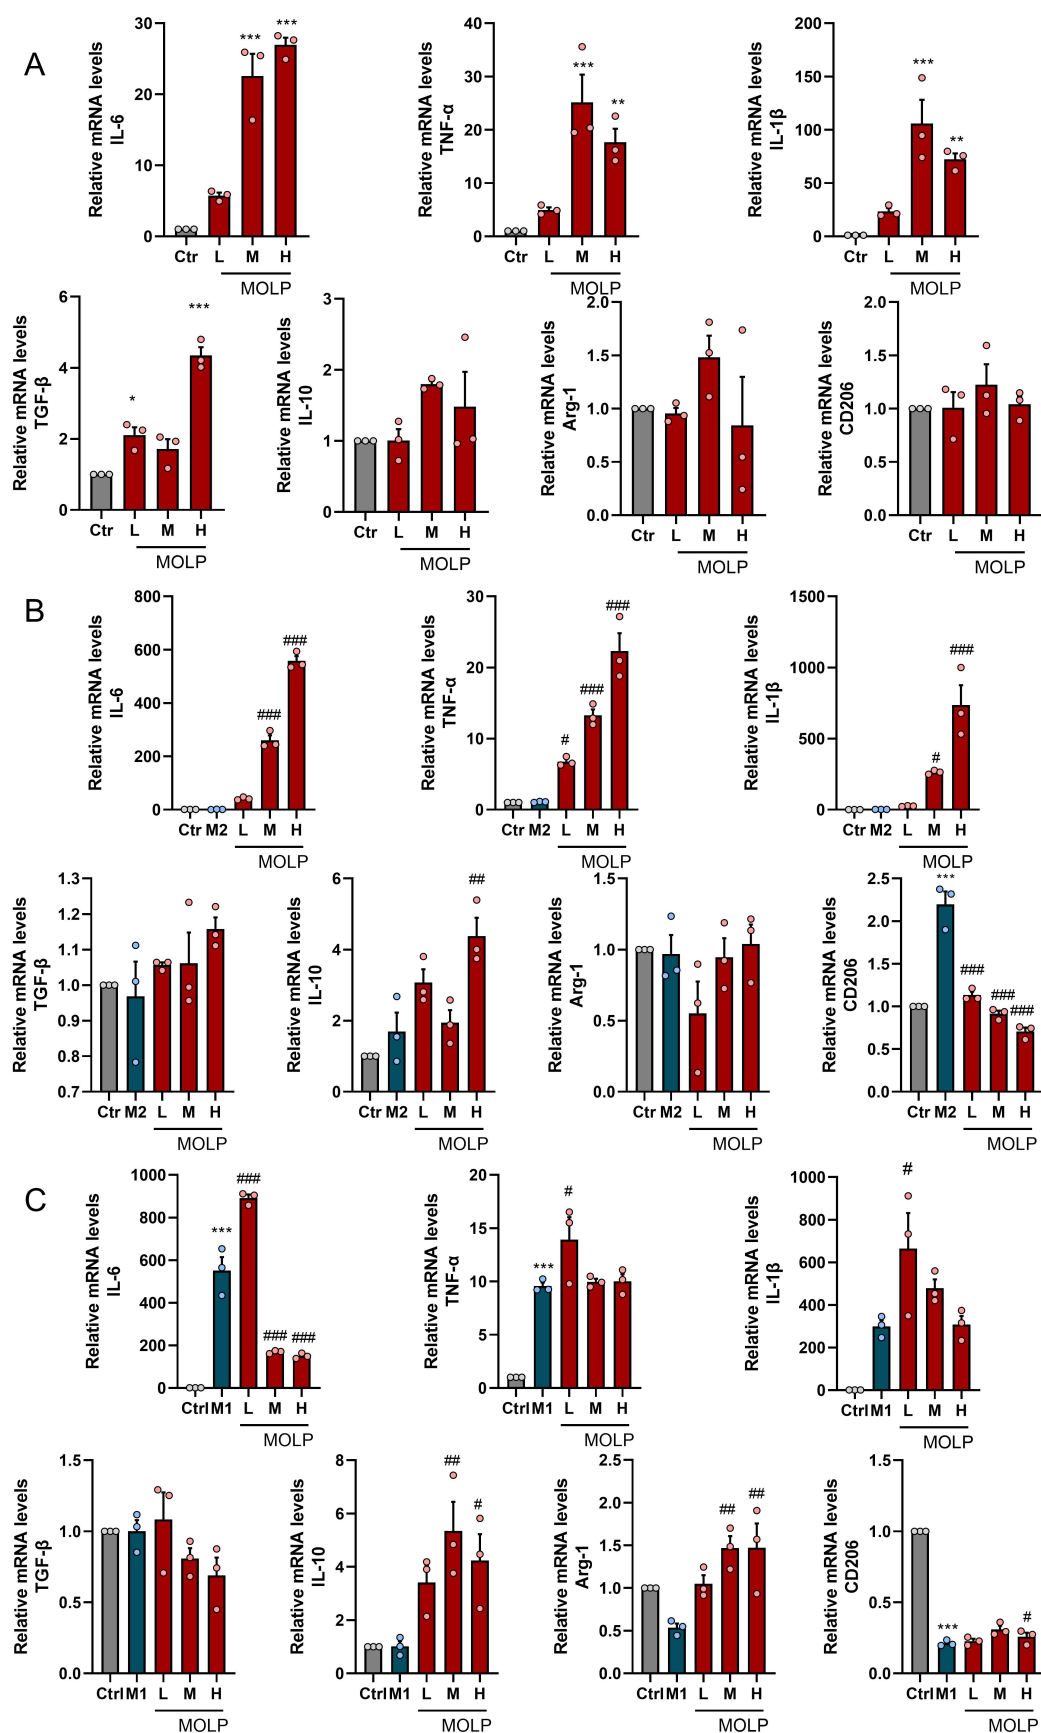

Figure S1. Immunomodulatory effects of MOLP on the mRNA levels of M1/M2 marker genes in Raw 264.7 cells (A) MOLP acted on untreated Raw 264.7 (B)MOLP acted onM2 Raw 264.7 (C)MOLP acted onM2 Raw 264.7 Error bars are represented as means  $\pm$  SEM. \**p*-value < 0.05, \*\**p*-value < 0.01 and \*\*\**p*-value < 0.001. (#*p* value < 0.05, ##*p*-value < 0.01, ###*p*-value < 0.001 according to the model group statistics).
