# Supplementary material for: Moringa oleiferaleaf polysaccharides exert anti-lung cancer effects upon targeting TLR4 to reverse the tumor-associated macrophage phenotype and promote T-cell infiltration
Source: Royal Society of Chemistry journal article supplement (doi:10.1039/d2fo03685a), 2023-01-01
Supplement: d2fo03685a2.pdf [file d2fo03685a2.pdf]

Table S1 Primers used in Quantitative RT- PCR (QRT-PCR).

| Gene name | Forward primer 5'-3'          | Reverse primer 5'-3'      |
|-----------|-------------------------------|---------------------------|
| VEGF      | GGGCTCTTCTCGCTCCGTAGTAG       | CCCTCTCCTCTTCCTTCTCTTCCTC |
| Ki67      | GCGGTGGAATGGTGCCTGTC          | GCCAGTAACACGAGAGTCTTCATCC |
| INOS      | ATCTTGAGCGAGTTGTGGATTGTC      | TAGGTGAGGGCTTGGCTGAGTG    |
| IL-6      | CTCCCAACAGACCTGTCTATAC        | CCATTGCACAACCTTTTTCTCA    |
| IL-1β     | CACTACAGGCTCCGAGATGAACAA<br>C | TGTCGTTGCTTGGTTCTCCTTGATC |
| TNF-α     | CGCTCTTCTGTCTACTGAACTTCGG     | GTGGTTTGTGAGTGTGAGGGTCTG  |
| IL12-P40  | TGAGAAGTATTCAGTGTCCCTGC       | CTGTGAGTTCTTCAAAGGCTTC    |
| IL-10     | TTCTTTCAAACAAAGGACCAGC        | GCAACCCAAGTAACCCTTAAAG    |
| TGF-β     | ACCGCAACAACGCCATCTATGAG       | GGCACTGCTTCCCGAATGTCTG    |
| Arg-1     | CATATCTGCCAAAGACATCGTG        | GACATCAAAGCTCAGGTGAATC    |
| CD206     | GTCTGAGTGTACGCAGTGGTTGG<br>C  | TCTGATGATGGACTTCCTGGTAGC  |
| CXCL9     | AATCCCTCAAAGACCTCAAACA        | TCCCATTCTTTCATCAGCTTCT    |
| CXCL10    | CAACTGCATCCATATCGATGAC        | GATTCCGGATTTCAGACATCTCT   |
| GZMB      | GTGCTGACTGCTGCTCACTGTG        | TTGCTGGGTCTTCTCCTGTTCTTTG |
| Prf1      | TTCTTGGTTCTTGTGACAGGTC        | ATGGTAGGAGAATTCACCCTG     |
| CD14      | CTTGGCTTGTGCTGTTGCTTCTG       | CGCTGGACCAATCTGGCTTCG     |
| CR3       | GAGCATCAATAGCCAGCCTCAGTG      | CCAACAGCCAGGTCCATCAAGC    |
| Dectin-1  | TGCTCCCAGCTAGGTGCTCATC        | TACGGTGAGACGATGTTTGGCTTTC |
| TLR2      | CTCCCAGATGCTTCGTTGTTCCC       | GTTGTCGCCTGCTTCCAGAGTC    |
| TLR4      | GAGCCGGAAGGTTATTGTGGTAGT<br>G | AGGACAATGAAGATGATGCCAGAGC |
| MR        | GAAACCAAAGGCTACCACAGTCTC<br>C | GTCCAAGAGAAGAACGCTCCAAGG  |
| HPRT-1    | CCGAGGATTTGGAAAAAGTGTT        | CATCTCCTTCATGACATCTCGA    |

| Index                    | MOP            |
|--------------------------|----------------|
| Total Sugar/%            | 72.13% ± 1.06% |
| Protein/%                | 1.22% ± 0.21%  |
| Glyoxylate/%             | 2.69% ± 0.27%  |
| Molecular weight/kDa     | 17.345         |
| Monosaccharide content/% |                |
| Man                      | 2.599          |
| GlcN                     | 0.697          |
| Rha                      | 7.264          |
| GlcA                     | 1.373          |
| Gala                     | 2.339          |
| Glc                      | 16.932         |
| Gal                      | 44.603         |
| Ara                      | 24.193         |

Table S2 Chemical composition, molecular weight and monosaccharide composition of MOP.
